# Supplementary material for: Electron correlation effects in boron clusters BQn (for Q = −1, 0, 1 and n ≤ 13) based on quantum Monte Carlo simulations
Source: Royal Society of Chemistry journal article supplement (doi:10.1039/d1cp04737j), 2022-01-01
Supplement: d1cp04737j1.pdf [file d1cp04737j1.pdf]

**Supplemental Material (ESI) to:  
Electron correlation effects in boron clusters  $B_n^Q$  (for  $Q = -1, 0, 1$  and  $n \leq 13$ ) based on  
quantum Monte Carlo simulations**

E. M. Isaac Moreira<sup>a</sup>, B. G. A. Brito<sup>b</sup>, G.-Q. Hai<sup>c</sup>, and L. Cândido<sup>a</sup>

<sup>a</sup>*Instituto de Física, Universidade Federal de Goiás, 74001-970, Goiânia, GO, Brazil\**

<sup>b</sup>*Departamento de Física, Instituto de Ciências Exatas e Naturais e Educação (ICENE),*

*Universidade Federal do Triângulo Mineiro, 38064-200, Uberaba, MG, Brazil and*

<sup>c</sup>*Instituto de Física de São Carlos, Universidade de São Paulo, 13560-970 São Carlos, SP, Brazil*

(Dated: December 13, 2021)

---

\* ladir@ufg.br



|    |           |           |           |        |           |           |           |        |           |           |           |        |
|----|-----------|-----------|-----------|--------|-----------|-----------|-----------|--------|-----------|-----------|-----------|--------|
|    | 1.790837  | -0.000230 | 0.000001  |        | 1.790276  | -0.002948 | 0.000001  |        | 1.766187  | -0.002610 | 0.000001  |        |
|    | 1.116455  | 1.399947  | 0.000001  |        | 1.107500  | 1.433577  | 0.000000  |        | 1.094917  | 1.411738  | 0.000000  |        |
|    | -0.398251 | 1.745673  | -0.000001 |        | -0.397137 | 1.784331  | 0.000000  |        | -0.392792 | 1.759181  | 0.000000  |        |
|    | -1.613102 | 0.777172  | 0.000000  |        | -1.609608 | 0.802032  | 0.000000  |        | -1.588973 | 0.788675  | 0.000000  |        |
|    | -1.613244 | -0.777080 | 0.000001  |        | -1.608715 | -0.797752 | 0.000000  |        | -1.587978 | -0.784859 | 0.000000  |        |
|    | -0.398479 | -1.745759 | 0.000000  |        | -0.392333 | -1.783776 | 0.000000  |        | -0.388641 | -1.758529 | 0.000000  |        |
|    | 1.116279  | -1.400230 | 0.000000  |        | 1.110628  | -1.435968 | 0.000001  |        | 1.097860  | -1.414104 | 0.000001  |        |
| 9  | 1.758925  | -0.006585 | -0.011055 | 0.7687 | 1.711153  | 0.017080  | -0.050012 | 0.0    | 0.000000  | 0.000000  | 0.000000  | 0.0    |
|    | 1.096470  | 1.368471  | -0.018387 |        | 1.179405  | 1.500707  | -0.104265 |        | 1.974961  | -0.000120 | 0.000000  |        |
|    | -0.391442 | 1.708061  | -0.017047 |        | -0.388959 | 1.825657  | -0.102707 |        | 1.397626  | 1.397642  | 0.000000  |        |
|    | -1.585024 | 0.757346  | -0.008323 |        | -1.503348 | 0.725233  | -0.019758 |        | -0.000121 | 1.975014  | 0.000000  |        |
|    | -1.584373 | -0.769247 | 0.000955  |        | -1.634745 | -0.830061 | 0.080100  |        | -1.397729 | 1.397750  | 0.000000  |        |
|    | -0.391418 | -1.720401 | 0.004883  |        | -0.436950 | -1.884748 | 0.092402  |        | -1.974961 | 0.000120  | 0.000000  |        |
|    | 1.096663  | -1.381562 | -0.000655 |        | 1.072702  | -1.403148 | 0.056460  |        | -1.397626 | -1.397642 | 0.000000  |        |
|    | 0.000082  | -0.006999 | -0.869754 |        | 0.121712  | 0.323764  | -0.754077 |        | 0.000121  | -1.975014 | 0.000000  |        |
|    | 0.001197  | -0.003175 | 0.843664  |        | -0.119889 | -0.328575 | 0.726138  |        | 1.397729  | -1.397750 | 0.000000  |        |
| 10 | -0.176565 | 0.309350  | -0.388888 | 0.0    | -0.165067 | 0.290476  | -0.220815 | 0.7601 | -0.157257 | 0.277747  | -0.204822 | 0.7848 |
|    | 1.444187  | 0.303946  | -0.023773 |        | 1.483873  | 0.271838  | -0.071579 |        | 1.480572  | 0.315396  | -0.080312 |        |
|    | 0.771862  | 1.771037  | -0.074924 |        | 0.772005  | 1.771128  | -0.074729 |        | 0.791786  | 1.783252  | -0.074568 |        |
|    | -0.961372 | 1.588482  | 0.237131  |        | -0.972682 | 1.607449  | 0.067365  |        | -0.980551 | 1.620304  | 0.053255  |        |
|    | -1.909534 | 0.127144  | -0.076098 |        | -1.909855 | 0.126968  | -0.076713 |        | -1.929654 | 0.114830  | -0.076476 |        |
|    | -0.907336 | -1.137810 | -0.025716 |        | -0.896675 | -1.187593 | -0.073397 |        | -0.933988 | -1.164875 | -0.082216 |        |
|    | 0.669971  | -1.071693 | -0.118483 |        | 0.685348  | -1.096825 | -0.112990 |        | 0.668062  | -1.068644 | -0.106977 |        |
|    | -2.582203 | 1.594261  | -0.127180 |        | -2.621813 | 1.626287  | -0.078445 |        | -2.618427 | 1.582690  | -0.070351 |        |
|    | -1.807774 | 2.969785  | -0.031832 |        | -1.823200 | 2.994917  | -0.036451 |        | -1.805917 | 2.966730  | -0.043463 |        |
|    | -0.230467 | 3.035917  | -0.124617 |        | -0.241165 | 3.085775  | -0.076629 |        | -0.203858 | 3.062990  | -0.068451 |        |
| 11 | -4.603442 | 2.858928  | 0.036733  | 0.7662 | -4.608203 | 2.843901  | -0.049275 | 0.0    | -4.588063 | 2.846622  | 0.036919  | 0.0    |
|    | -3.046900 | 3.084275  | -0.012827 |        | -3.041527 | 3.038619  | -0.014371 |        | -3.058621 | 3.178288  | -0.010752 |        |
|    | -1.483175 | 3.256969  | -0.064711 |        | -1.475336 | 3.237529  | 0.020659  |        | -1.495253 | 3.241062  | -0.065507 |        |
|    | -3.693128 | 1.387436  | -0.027037 |        | -3.665275 | 1.376172  | 0.159381  |        | -3.720749 | 1.351631  | -0.028889 |        |
|    | -1.999016 | 1.606233  | -0.087368 |        | -2.025596 | 1.595429  | -0.274471 |        | -1.964630 | 1.577092  | -0.087337 |        |
|    | -5.381734 | 1.521559  | 0.034496  |        | -5.416829 | 1.527415  | 0.061683  |        | -5.376551 | 1.527392  | 0.035028  |        |
|    | -0.397449 | 2.155848  | -0.130466 |        | -0.365914 | 2.171184  | -0.156730 |        | -0.404447 | 2.159880  | -0.130084 |        |
|    | -1.840636 | -0.280315 | -0.135468 |        | -1.840278 | -0.268536 | -0.114585 |        | -1.830702 | -0.262796 | -0.135349 |        |
|    | -3.382508 | -0.479800 | -0.083846 |        | -3.383399 | -0.463825 | -0.104127 |        | -3.394951 | -0.462901 | -0.083286 |        |
|    | -0.588006 | 0.619134  | -0.159556 |        | -0.575691 | 0.646535  | -0.131876 |        | -0.568458 | 0.598591  | -0.160632 |        |
|    | -4.817376 | 0.080492  | -0.018908 |        | -4.835324 | 0.106334  | -0.045247 |        | -4.830946 | 0.055897  | -0.019070 |        |
| 12 | -0.047676 | -0.136640 | 0.285850  | 0.0    | -0.084868 | -0.139677 | 0.307817  | 0.7865 | -0.078839 | -0.119561 | 0.276395  | 0.7584 |
|    | 1.709626  | -0.147956 | -0.155339 |        | 1.755054  | -0.172999 | -0.211314 |        | 1.822320  | -0.209844 | -0.152078 |        |
|    | 0.762470  | 1.335743  | 0.280204  |        | 0.746115  | 1.367627  | 0.302406  |        | 0.732248  | 1.351395  | 0.270960  |        |
|    | -0.917251 | 1.300926  | 0.283819  |        | -0.924202 | 1.305755  | 0.342624  |        | -0.932586 | 1.309931  | 0.190796  |        |
|    | -1.806126 | -0.217853 | -0.149880 |        | -1.777674 | -0.182318 | -0.122759 |        | -1.789388 | -0.207572 | -0.152303 |        |
|    | -0.799285 | -1.477689 | -0.277759 |        | -0.792330 | -1.485193 | -0.278849 |        | -0.786332 | -1.466685 | -0.256758 |        |
|    | 0.753732  | -1.447160 | -0.279952 |        | 0.757704  | -1.429478 | -0.284547 |        | 0.788810  | -1.419328 | -0.276314 |        |
|    | 2.297442  | 1.353281  | -0.289380 |        | 2.284934  | 1.340744  | -0.293862 |        | 2.292964  | 1.309169  | -0.285515 |        |
|    | -2.452468 | 1.259525  | -0.282448 |        | -2.459609 | 1.253064  | -0.327090 |        | -2.496208 | 1.289908  | -0.250231 |        |
|    | 1.494823  | 2.683168  | -0.291886 |        | 1.504418  | 2.681068  | -0.293122 |        | 1.491973  | 2.666244  | -0.270841 |        |
|    | -0.107696 | 2.861984  | -0.160439 |        | -0.122914 | 2.819589  | -0.133380 |        | -0.107910 | 2.842784  | -0.163174 |        |
|    | -1.702192 | 2.619500  | -0.286790 |        | -1.701230 | 2.628644  | -0.331926 |        | -1.751653 | 2.640386  | -0.254937 |        |
| 13 | -0.070977 | 0.060071  | -0.106027 | 0.7596 | -0.040725 | 0.042369  | -0.106103 | 0.0    | 0.008139  | 0.025827  | -0.244109 | 0.0    |
|    | 1.642714  | 0.104586  | -0.113159 |        | 1.666290  | 0.080420  | -0.112473 |        | 1.561473  | 0.041935  | 0.222637  |        |
|    | 0.624701  | 1.724877  | -0.116636 |        | 0.615828  | 1.749102  | -0.115824 |        | 0.799828  | 1.592341  | -0.051693 |        |
|    | -0.956861 | 1.453156  | -0.109114 |        | -0.943949 | 1.454777  | -0.108918 |        | -0.816566 | 1.574932  | -0.049870 |        |
|    | -1.720297 | 0.137203  | -0.100598 |        | -1.715307 | 0.125166  | -0.100446 |        | -1.544179 | 0.008732  | 0.225970  |        |
|    | -1.170328 | -1.370622 | -0.095241 |        | -1.196439 | -1.375017 | -0.095915 |        | -0.783211 | -1.541100 | -0.053277 |        |
|    | 0.739141  | -1.450091 | -0.102616 |        | 0.772480  | -1.458740 | -0.102623 |        | 0.833204  | -1.523735 | -0.054888 |        |
|    | 2.447427  | -2.293801 | -0.105676 |        | 2.404986  | -2.293308 | -0.104935 |        | -2.437206 | 1.376093  | -0.046176 |        |
|    | 3.222073  | -0.958059 | -0.113774 |        | 3.201453  | -0.921576 | -0.113831 |        | 2.424304  | 1.428163  | -0.051545 |        |
|    | 2.196099  | 1.714717  | -0.120581 |        | 2.202047  | 1.736096  | -0.121738 |        | 2.453880  | -1.324831 | -0.054316 |        |

|      |           |           |           |        |           |           |           |   |           |           |           |
|------|-----------|-----------|-----------|--------|-----------|-----------|-----------|---|-----------|-----------|-----------|
|      | -0.382659 | -2.730342 | -0.092628 |        | -0.398200 | -2.745875 | -0.092840 |   | -2.407691 | -1.376860 | -0.049236 |
|      | 3.243771  | 0.600412  | -0.120123 |        | 3.258668  | 0.622980  | -0.120781 |   | -3.167683 | -0.008512 | 0.079678  |
|      | 1.105039  | -3.085837 | -0.096897 |        | 1.092710  | -3.110122 | -0.096641 |   | 3.184600  | 0.059548  | 0.072816  |
| 13*  | -0.021155 | -0.395748 | -0.086616 | 0.7631 | -         | -         | -         | - | -         | -         | -         |
|      | 2.160032  | -0.083440 | -0.091845 |        | -         | -         | -         | - | -         | -         | -         |
|      | 0.794264  | 1.173661  | -0.113431 |        | -         | -         | -         | - | -         | -         | -         |
|      | -0.901752 | 1.133977  | -0.110613 |        | -         | -         | -         | - | -         | -         | -         |
|      | -2.186719 | -0.190549 | -0.085558 |        | -         | -         | -         | - | -         | -         | -         |
|      | -1.405651 | -1.529881 | -0.068528 |        | -         | -         | -         | - | -         | -         | -         |
|      | 1.439485  | -1.453046 | -0.072512 |        | -         | -         | -         | - | -         | -         | -         |
|      | 2.419752  | 1.481260  | -0.115627 |        | -         | -         | -         | - | -         | -         | -         |
|      | -2.538473 | 1.358398  | -0.109316 |        | -         | -         | -         | - | -         | -         | -         |
|      | 1.493396  | 2.691797  | -0.136223 |        | -         | -         | -         | - | -         | -         | -         |
|      | -0.093111 | 2.786330  | -0.138998 |        | -         | -         | -         | - | -         | -         | -         |
|      | -1.676631 | 2.613676  | -0.132465 |        | -         | -         | -         | - | -         | -         | -         |
|      | 0.031014  | -2.077526 | -0.062278 |        | -         | -         | -         | - | -         | -         | -         |
| 13** | 0.008638  | 0.025391  | 0.240509  | 0.7610 | -         | -         | -         | - | -         | -         | -         |
|      | 1.588487  | 0.042191  | 0.334870  |        | -         | -         | -         | - | -         | -         | -         |
|      | 0.804803  | 1.620738  | 0.085255  |        | -         | -         | -         | - | -         | -         | -         |
|      | -0.822078 | 1.604679  | 0.085754  |        | -         | -         | -         | - | -         | -         | -         |
|      | -1.571002 | 0.008210  | 0.338067  |        | -         | -         | -         | - | -         | -         | -         |
|      | -0.787822 | -1.570248 | 0.082657  |        | -         | -         | -         | - | -         | -         | -         |
|      | 0.838773  | -1.553317 | 0.081262  |        | -         | -         | -         | - | -         | -         | -         |
|      | -2.383679 | 1.386949  | -0.193350 |        | -         | -         | -         | - | -         | -         | -         |
|      | 2.370297  | 1.437869  | -0.198903 |        | -         | -         | -         | - | -         | -         | -         |
|      | 2.399851  | -1.335173 | -0.201534 |        | -         | -         | -         | - | -         | -         | -         |
|      | -2.354092 | -1.386328 | -0.196233 |        | -         | -         | -         | - | -         | -         | -         |
|      | -3.118994 | -0.007841 | -0.252789 |        | -         | -         | -         | - | -         | -         | -         |
|      | 3.135709  | 0.059412  | -0.259574 |        | -         | -         | -         | - | -         | -         | -         |

## S2. THE CBS EXTRAPOLATION SCHEMES

We use the Gaussian program[1] to carry out the HF calculations with subsequent extrapolation to the CBS limit. To do this, we employed a hierarchically designed correlated basis set, aug-cc-pVXZ, where  $X$  is a cardinal number, the highest angular momentum included in the basis set. For the HF/CBS energy extrapolation we use five schemes[3] which will denoted as CBS $_n$  where  $n = 1, 2, \dots, 5$ . The first one, CBS $_1$ , is an exponential scheme[4],

$$Y(X) = Y_{CBS} + A \exp(-BX) \quad (\text{S1})$$

where  $Y_{CBS}$  is the energy in the CBS limit,  $Y(X)$  the energy with a given basis set.  $Y_{CBS}$ , A and B are fitting parameters. The second one, CBS $_2$ , is a power extrapolation scheme[5]

$$Y(X) = Y_{CBS} + AX^{-B} \quad (\text{S2})$$

the third one, CBS $_3$ , is a mixed exponential scheme[5]

$$Y(X) = Y_{CBS} + A \exp(-(X-1)) + B \exp(-(X-1)^2), \quad (\text{S3})$$

the fourth one[6, 7], CBS $_4$ , is given by

$$Y(X) = Y_{CBS} + \frac{A}{(X+1/2)^B}, \quad (\text{S4})$$

the last one[6, 7] CBS $_5$ , is

$$Y(X) = Y_{CBS} + \frac{A}{(X+1/2)^4} + \frac{B}{(X+1/2)^6}. \quad (\text{S5})$$

The CBS extrapolations of the HF energies of  $B_n^Q$  (for  $Q = -1, 0, 1$  and  $n \leq 13$ ) clusters according to the above schemes Eqs. (S1)-(S5) are shown in Table S2. It can be seen that the five adopted extrapolation schemes work well for clusters with up to five atoms, whereas, for larger clusters, we found good fitting results with the schemes CBS<sub>3</sub> and CBS<sub>5</sub>.

TABLE S2: The HF energies of the  $B_n^Q$  (for  $Q = -1, 0, 1$  and  $n \leq 13$ ) clusters at different basis set calculated using Gaussian program[1] and the CBS extrapolation of the HF energies using the methods denoted as CBS<sub>*n*</sub> where  $n = 1, 2, \dots, 5$ .

| Cluster size, $n$ | Basis set        | $B_n$         | $B_n^+$       | $B_n^-$       |
|-------------------|------------------|---------------|---------------|---------------|
| 1                 | aug-cc-pVDZ      | -24.53057377  | -24.23501373  | -24.51954239  |
|                   | aug-cc-pVTZ      | -24.53217153  | -24.23681573  | -24.52094707  |
|                   | aug-cc-pVQZ      | -24.53298389  | -24.23747329  | -24.52178338  |
|                   | aug-cc-pV5Z      | -24.53313019  | -24.23754633  | -24.52194427  |
|                   | CBS <sub>1</sub> | -24.5334      | -24.2377      | -24.5223      |
|                   | CBS <sub>2</sub> | -24.5339      | -24.2379      | -24.5230      |
|                   | CBS <sub>3</sub> | -24.5333      | -24.2377      | -24.5222      |
|                   | CBS <sub>4</sub> | -24.5337      | -24.2378      | -24.5228      |
|                   | CBS <sub>5</sub> | -24.5334      | -24.2378      | -24.5223      |
| 2                 | aug-cc-pVDZ      | -49.08766994  | -48.76340558  | -49.16993215  |
|                   | aug-cc-pVTZ      | -49.09264235  | -48.76844821  | -49.17480280  |
|                   | aug-cc-pVQZ      | -49.09457495  | -48.77032570  | -49.17678100  |
|                   | aug-cc-pV5Z      | -49.09488696  | -48.77062018  | -49.17712554  |
|                   | CBS <sub>1</sub> | -49.0953      | -48.7710      | -49.1775      |
|                   | CBS <sub>2</sub> | -49.0960      | -48.7716      | -49.1784      |
|                   | CBS <sub>3</sub> | -49.0954      | -48.7712      | -49.1776      |
|                   | CBS <sub>4</sub> | -49.0959      | -48.7715      | -49.1782      |
|                   | CBS <sub>5</sub> | -49.0956      | -48.7713      | -49.1778      |
| 2*                | aug-cc-pVDZ      | -49.03890972  | -             | -             |
|                   | aug-cc-pVTZ      | -49.04375611  | -             | -             |
|                   | aug-cc-pVQZ      | -49.04566991  | -             | -             |
|                   | aug-cc-pV5Z      | -49.04597036  | -             | -             |
|                   | CBS <sub>1</sub> | -49.0464      | -             | -             |
|                   | CBS <sub>2</sub> | -49.0471      | -             | -             |
|                   | CBS <sub>3</sub> | -49.0465      | -             | -             |
|                   | CBS <sub>4</sub> | -49.0469      | -             | -             |
|                   | CBS <sub>5</sub> | -49.0466      | -             | -             |
| 3                 | aug-cc-pVDZ      | -73.77983557  | -73.43296012  | -73.82014472  |
|                   | aug-cc-pVTZ      | -73.79555343  | -73.44556281  | -73.83438643  |
|                   | aug-cc-pVQZ      | -73.79968694  | -73.44932157  | -73.83821354  |
|                   | aug-cc-pV5Z      | -73.80033485  | -73.44992715  | -73.83882411  |
|                   | CBS <sub>1</sub> | -73.8008      | -73.4504      | -73.8392      |
|                   | CBS <sub>2</sub> | -73.8018      | -73.4515      | -73.8402      |
|                   | CBS <sub>3</sub> | -73.8013      | -73.4508      | -73.8397      |
|                   | CBS <sub>4</sub> | -73.8016      | -73.4512      | -73.8400      |
|                   | CBS <sub>5</sub> | -73.8015      | -73.4511      | -73.8400      |
| 4                 | aug-cc-pVDZ      | -98.43989048  | -98.14816045  | -98.52748143  |
|                   | aug-cc-pVTZ      | -98.45924494  | -98.16649325  | -98.54674035  |
|                   | aug-cc-pVQZ      | -98.46423315  | -98.17157859  | -98.55169773  |
|                   | aug-cc-pV5Z      | -98.46513747  | -98.17249174  | -98.55261104  |
|                   | CBS <sub>1</sub> | -98.4656      | -98.1731      | -98.5531      |
|                   | CBS <sub>2</sub> | -98.4668      | -98.1758      | -98.5543      |
|                   | CBS <sub>3</sub> | -98.4663      | -98.1752      | -98.5537      |
|                   | CBS <sub>4</sub> | -98.4666      | -98.1749      | -98.5541      |
|                   | CBS <sub>5</sub> | -98.4666      | -98.1734      | -98.5540      |
| 5                 | aug-cc-pVDZ      | -123.15227140 | -122.83571838 | -123.15377873 |

|    |                  |               |               |               |
|----|------------------|---------------|---------------|---------------|
|    | aug-cc-pVTZ      | -123.17436796 | -122.85739648 | -123.17493761 |
|    | aug-cc-pVQZ      | -123.18027427 | -122.86318736 | -123.18066563 |
|    | aug-cc-pV5Z      | -123.18138860 | -122.86429776 | -123.18174708 |
|    | CBS <sub>3</sub> | -123.1827     | -122.8656     | -123.1830     |
|    | CBS <sub>5</sub> | -123.1831     | -122.8660     | -123.1834     |
| 6  | aug-cc-pVDZ      | -147.76319869 | -147.48717237 | -147.87803539 |
|    | aug-cc-pVTZ      | -147.79017225 | -147.51313297 | -147.90445261 |
|    | aug-cc-pVQZ      | -147.79737620 | -147.52031461 | -147.91137507 |
|    | aug-cc-pV5Z      | -147.79878584 | -147.52169885 | -147.91271401 |
|    | CBS <sub>3</sub> | -147.8004     | -147.5233     | -147.9143     |
|    | CBS <sub>5</sub> | -147.8009     | -147.5239     | -147.9147     |
| 6* | aug-cc-pVDZ      | -147.80143161 | -             | -147.83667918 |
|    | aug-cc-pVTZ      | -147.82888500 | -             | -147.86437640 |
|    | aug-cc-pVQZ      | -147.83589621 | -             | -147.87142761 |
|    | aug-cc-pV5Z      | -147.83723797 | -             | -147.87275897 |
|    | CBS <sub>3</sub> | -147.8388     | -             | -147.8743     |
|    | CBS <sub>5</sub> | -147.8392     | -             | -147.8748     |
| 7  | aug-cc-pVDZ      | -172.48112730 | -172.22154661 | -172.53475769 |
|    | aug-cc-pVTZ      | -172.51303088 | -172.25186286 | -172.56792644 |
|    | aug-cc-pVQZ      | -172.52131038 | -172.26004120 | -172.57633832 |
|    | aug-cc-pV5Z      | -172.52291920 | -172.26163308 | -172.57795736 |
|    | CBS <sub>3</sub> | -172.5248     | -172.2635     | -172.5798     |
|    | CBS <sub>5</sub> | -172.5253     | -172.2641     | -172.5804     |
| 7* | aug-cc-pVDZ      | -             | -             | -172.51550737 |
|    | aug-cc-pVTZ      | -             | -             | -172.54777036 |
|    | aug-cc-pVQZ      | -             | -             | -172.55603704 |
|    | aug-cc-pV5Z      | -             | -             | -172.55764341 |
|    | CBS <sub>3</sub> | -             | -             | -172.5595     |
|    | CBS <sub>5</sub> | -             | -             | -172.5600     |
| 8  | aug-cc-pVDZ      | -197.19110703 | -196.91019526 | -197.24912507 |
|    | aug-cc-pVTZ      | -197.22774609 | -196.94485270 | -197.28661156 |
|    | aug-cc-pVQZ      | -197.23697413 | -196.95394358 | -197.29590363 |
|    | CBS <sub>3</sub> | -197.2419     | -196.9589     | -197.3009     |
|    | CBS <sub>5</sub> | -197.2426     | -196.9596     | -197.3016     |
| 9  | aug-cc-pVDZ      | -221.82186050 | -221.54740028 | -221.89635257 |
|    | aug-cc-pVTZ      | -221.86192843 | -221.58643569 | -221.93880291 |
|    | aug-cc-pVQZ      | -221.87225965 | -221.59680346 | -221.94914155 |
|    | CBS <sub>3</sub> | -221.8779     | -221.6025     | -221.9547     |
|    | CBS <sub>5</sub> | -221.8787     | -221.6033     | -221.9554     |
| 10 | aug-cc-pVDZ      | -246.50683338 | -246.22722364 | -246.58056522 |
|    | aug-cc-pVTZ      | -246.55325972 | -246.27350908 | -246.62857419 |
|    | aug-cc-pVQZ      | -246.56483211 | -246.28505647 | -246.64023476 |
|    | CBS <sub>3</sub> | -246.5710     | -246.2913     | -246.6465     |
|    | CBS <sub>5</sub> | -246.5719     | -246.2921     | -246.6473     |
| 11 | aug-cc-pVDZ      | -271.18462827 | -270.92479966 | -271.27608286 |
|    | aug-cc-pVTZ      | -271.23631534 | -270.97407869 | -271.32684132 |
|    | aug-cc-pVQZ      | -271.24888667 | -270.98648913 | -271.33932128 |
|    | CBS <sub>3</sub> | -271.2556     | -270.9932     | -271.3460     |
|    | CBS <sub>5</sub> | -271.2565     | -270.9941     | -271.3469     |
| 12 | aug-cc-pVDZ      | -295.87496079 | -295.58802694 | -295.91991489 |
|    | aug-cc-pVTZ      | -295.93099327 | -295.64367079 | -295.97647807 |
|    | aug-cc-pVQZ      | -295.9448853  | -295.65762905 | -295.990396   |
|    | CBS <sub>3</sub> | -295.9523     | -295.6651     | -295.9978     |
|    | CBS <sub>5</sub> | -295.9534     | -295.6662     | -295.9989     |

|       |                  |               |               |               |
|-------|------------------|---------------|---------------|---------------|
| 13    | aug-cc-pVDZ      | -320.53345755 | -320.30108995 | -320.59841749 |
|       | aug-cc-pVTZ      | -320.59407279 | -320.35980147 | -320.65943769 |
|       | aug-cc-pVQZ      | -320.60881158 | -320.37440282 | -320.67434864 |
|       | CBS <sub>3</sub> | -320.6167     | -320.3822     | -320.6823     |
|       | CBS <sub>5</sub> | -320.6177     | -320.3833     | -320.6834     |
| 13*   | aug-cc-pVDZ      | -320.53144825 | —             | —             |
|       | aug-cc-pVTZ      | -320.59199321 | —             | —             |
|       | aug-cc-pVQZ      | -320.60674255 | —             | —             |
|       | CBS <sub>3</sub> | -320.6146     | —             | —             |
|       | CBS <sub>5</sub> | -320.6157     | —             | —             |
| 13 ** | aug-cc-pVDZ      | -320.50633686 | —             | —             |
|       | aug-cc-pVTZ      | -320.56605607 | —             | —             |
|       | aug-cc-pVQZ      | -320.5809227  | —             | —             |
|       | CBS <sub>3</sub> | -320.5889     | —             | —             |
|       | CBS <sub>5</sub> | -320.5900     | —             | —             |

- 
- [1] M. J. Frisch, G. W. Trucks, H. B. Schlegel, G. E. Scuseria, M. A. Robb, J. R. Cheeseman, G. Scalmani, V. Barone, B. Mennucci, G. A. Petersson, H. Nakatsuji, M. Caricato, X. Li, H. P. Hratchian, A. F. Izmaylov, J. Bloino, G. Zheng, J. L. Sonnenberg, M. Hada, M. Ehara, K. Toyota, R. Fukuda, J. Hasegawa, M. Ishida, T. Nakajima, Y. Honda, O. Kitao, H. Nakai, T. Vreven, J. A. Montgomery, Jr., J. E. Peralta, F. Ogliaro, M. Bearpark, J. J. Heyd, E. Brothers, K. N. Kudin, V. N. Staroverov, R. Kobayashi, J. Normand, K. Raghavachari, A. Rendell, J. C. Burant, S. S. Iyengar, J. Tomasi, M. Cossi, N. Rega, J. M. Millam, M. Klene, J. E. Knox, J. B. Cross, V. Bakken, C. Adamo, J. Jaramillo, R. Gomperts, R. E. Stratmann, O. Yazyev, A. J. Austin, R. Cammi, C. Pomelli, J. W. Ochterski, R. L. Martin, K. Morokuma, V. G. Zakrzewski, G. A. Voth, P. Salvador, J. J. Dannenberg, S. Dapprich, A. D. Daniels, O. Farkas, J. B. Foresman, J. V. Ortiz, J. Cioslowski, and D. J. Fox, *Gaussian Inc.: Wallingford CT*, 2009.
- [2] K. L. Schuchardt, B. T. Didier, T. Elsethagen, L. Sun, V. Gurumoorthi, J. Chase, J. Li, and T. L. Windus, *Journal of chemical information and modeling*, 2007, **47**(3), 1045–1052.
- [3] M. de Lara-Castells, R. Krems, A. A. Buchachenko, G. Delgado-Barrio, and P. Villarreal, *The Journal of Chemical Physics*, 2001, **115**(22), 10438–10449.
- [4] D. Feller, *The Journal of Chemical Physics*, 1993, **98**(9), 7059–7071.
- [5] D. E. Woon and T. H. Dunning Jr, *The Journal of Chemical Physics*, 1994, **101**(10), 8877–8893.
- [6] J. M. Martin and P. R. Taylor, *The Journal of Chemical Physics*, 1997, **106**(20), 8620–8623.
- [7] J. M. Martin, *Chemical Physics Letters*, 1996, **259**(5-6), 669–678.
